# Supplementary material
Source: publisher figshare collection journal article supplement (https://tandf.figshare.com/articles/dataset/_/5427301)
Supplement: Supplementary file 1 [file 1]

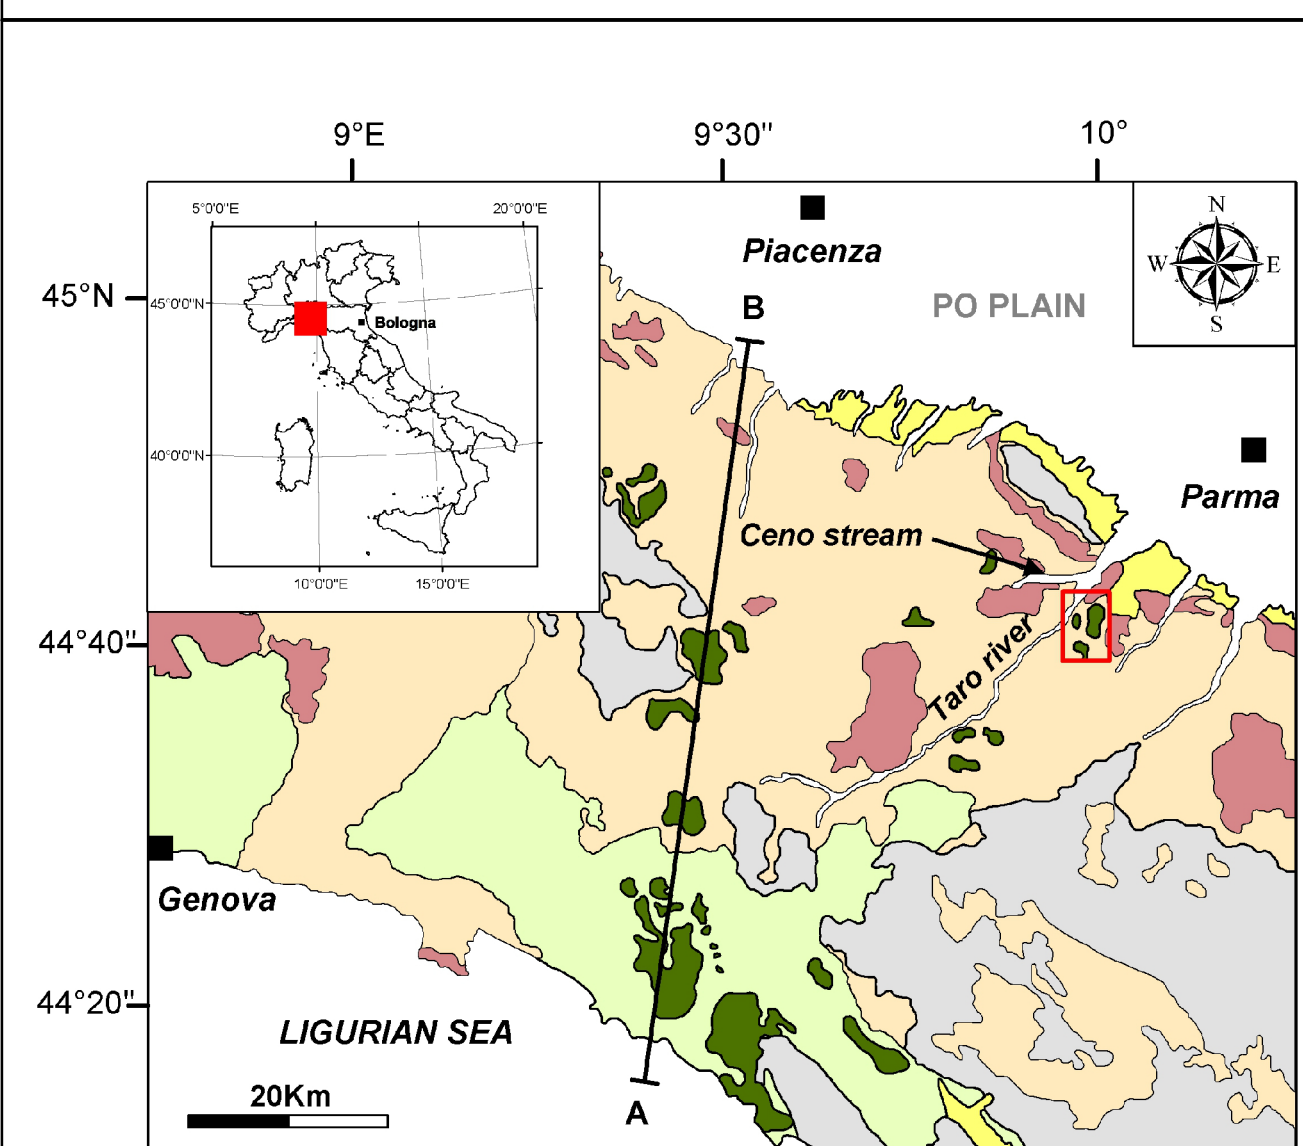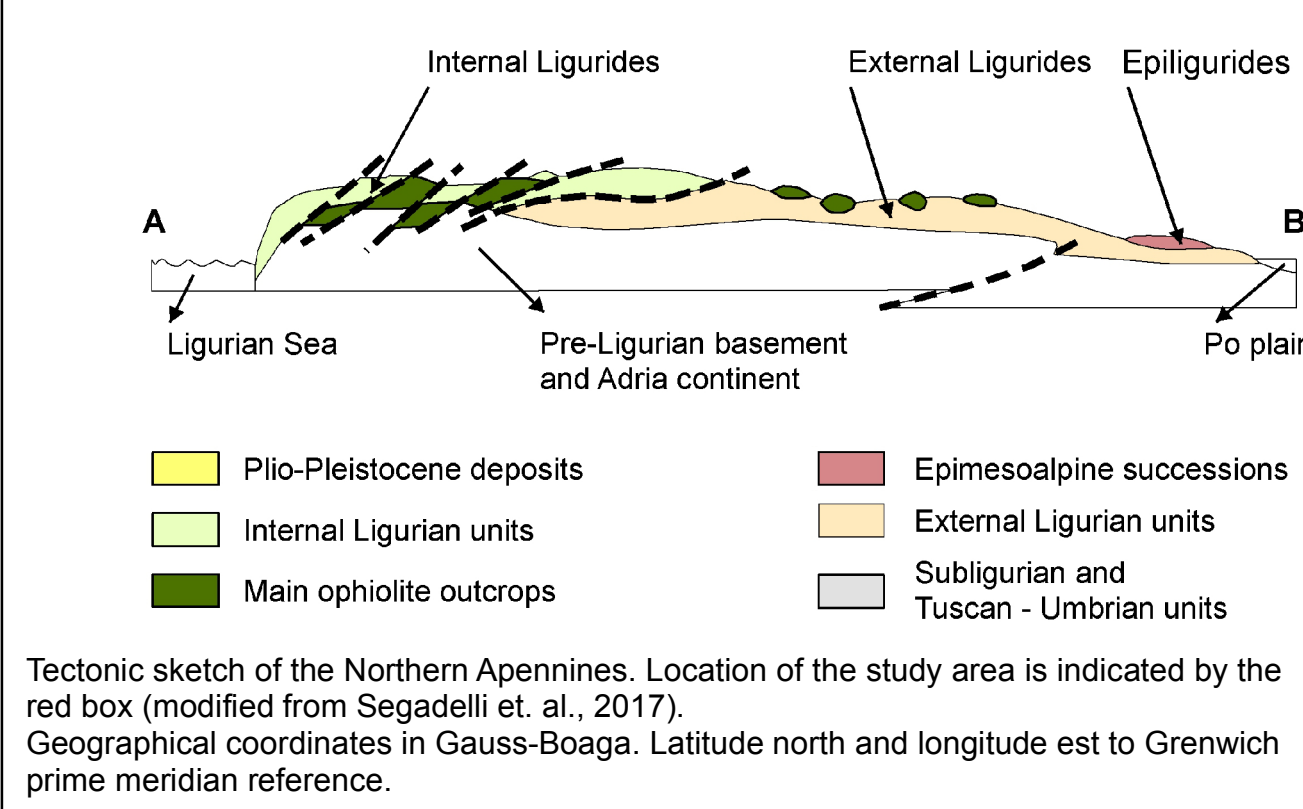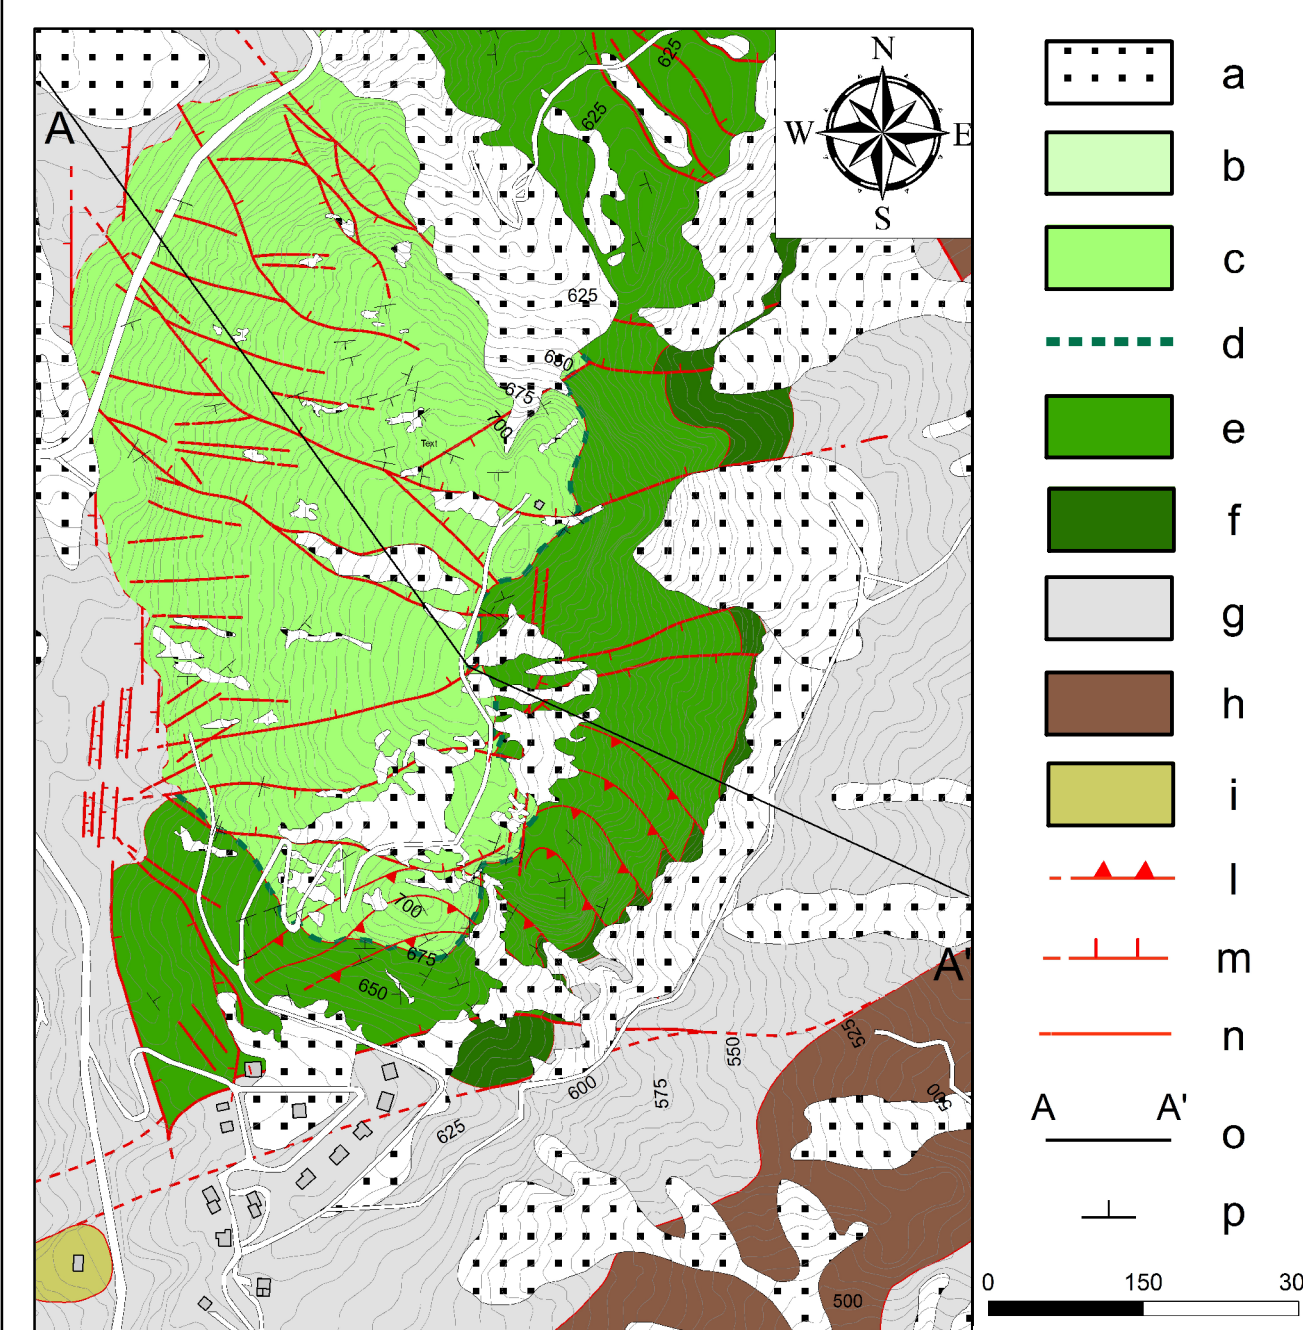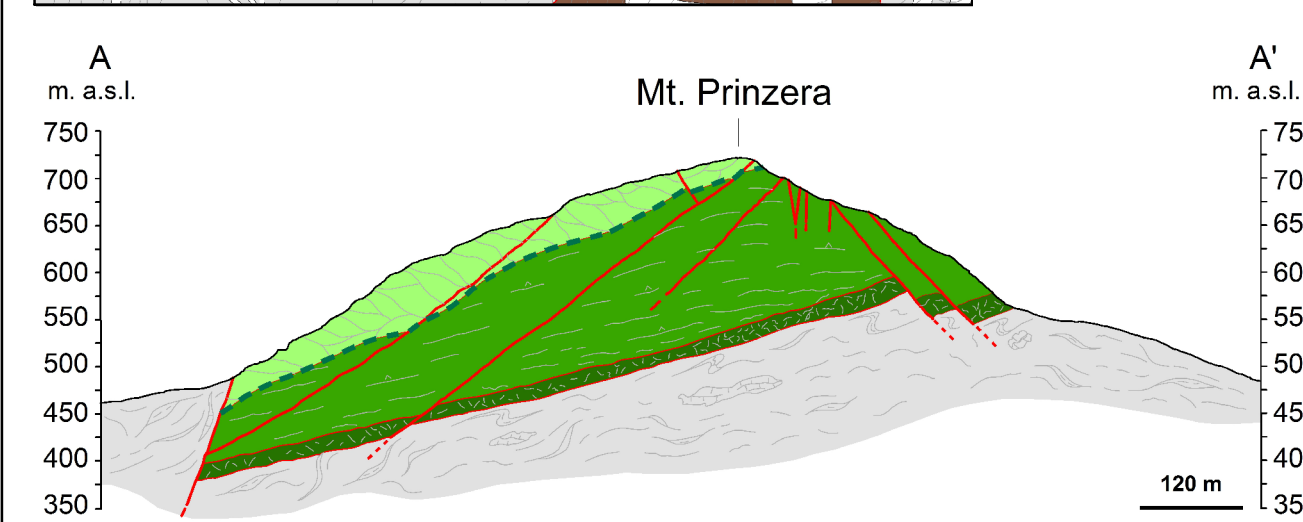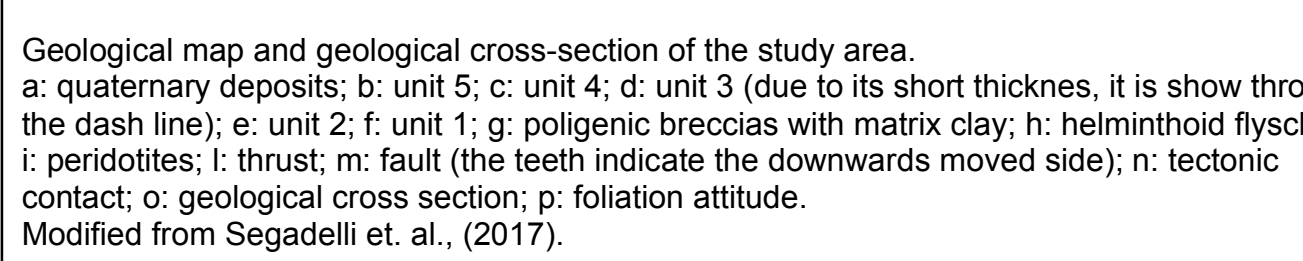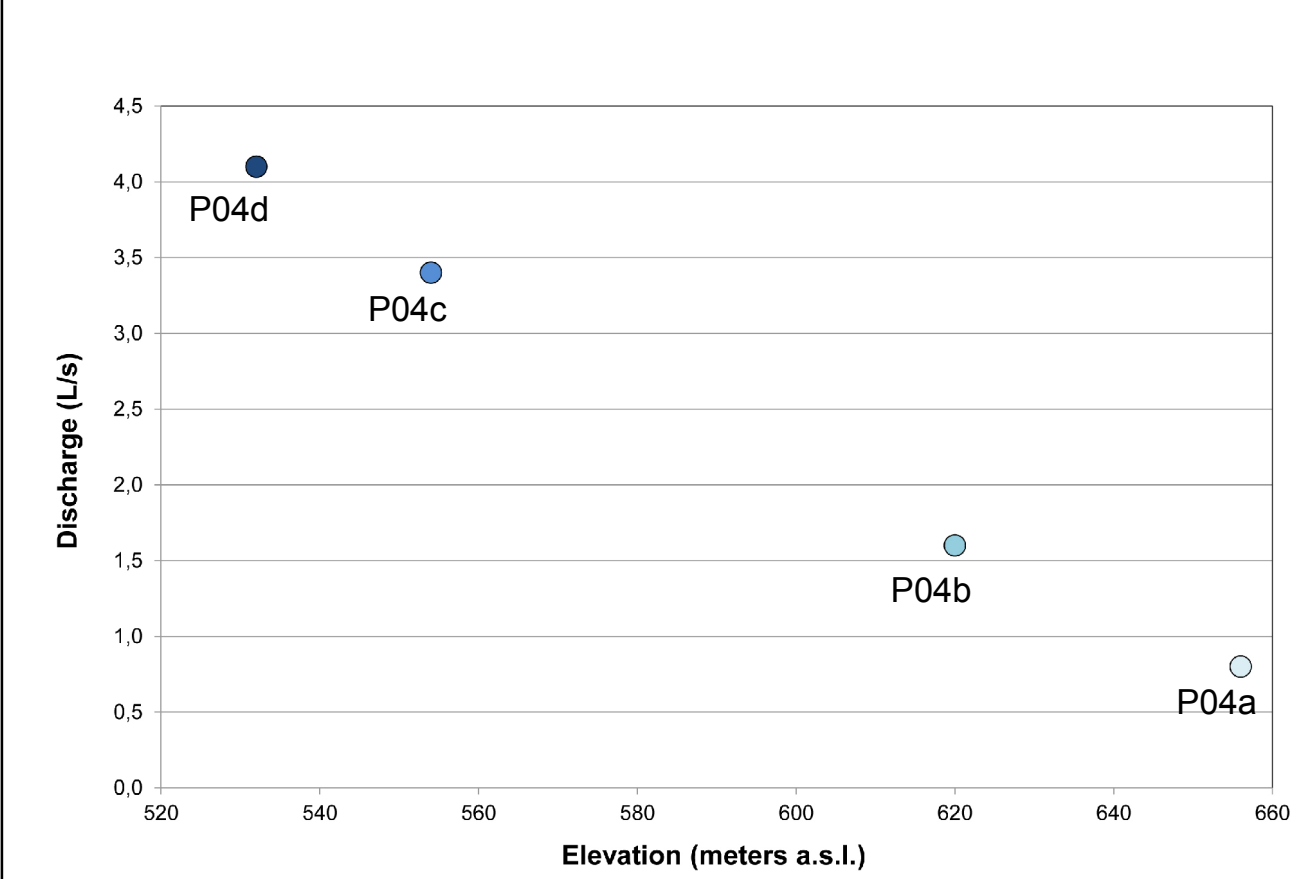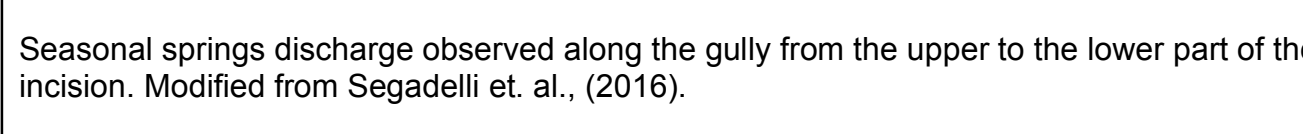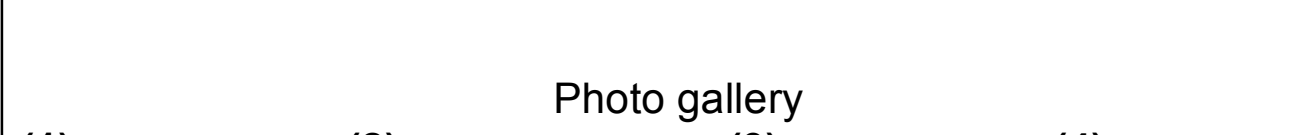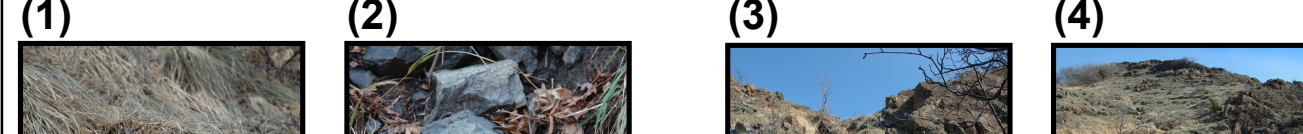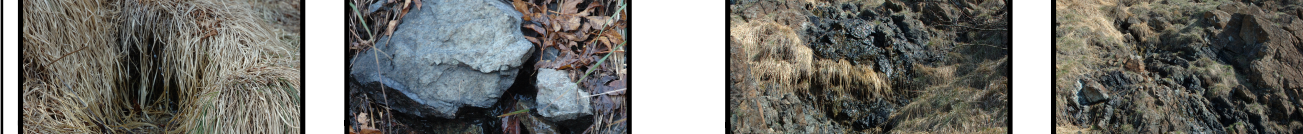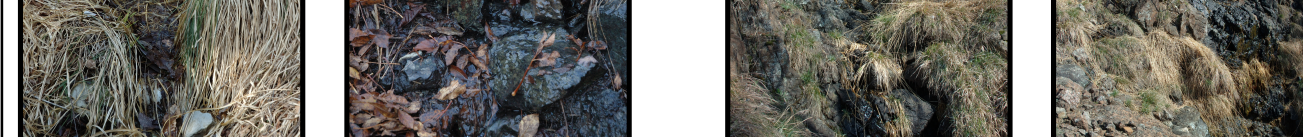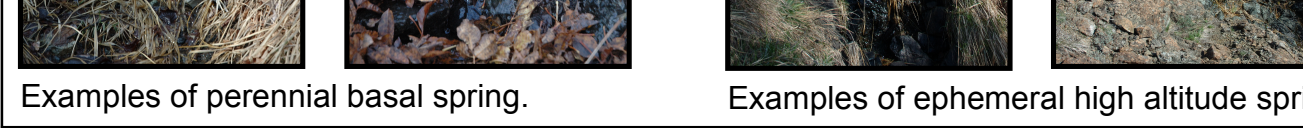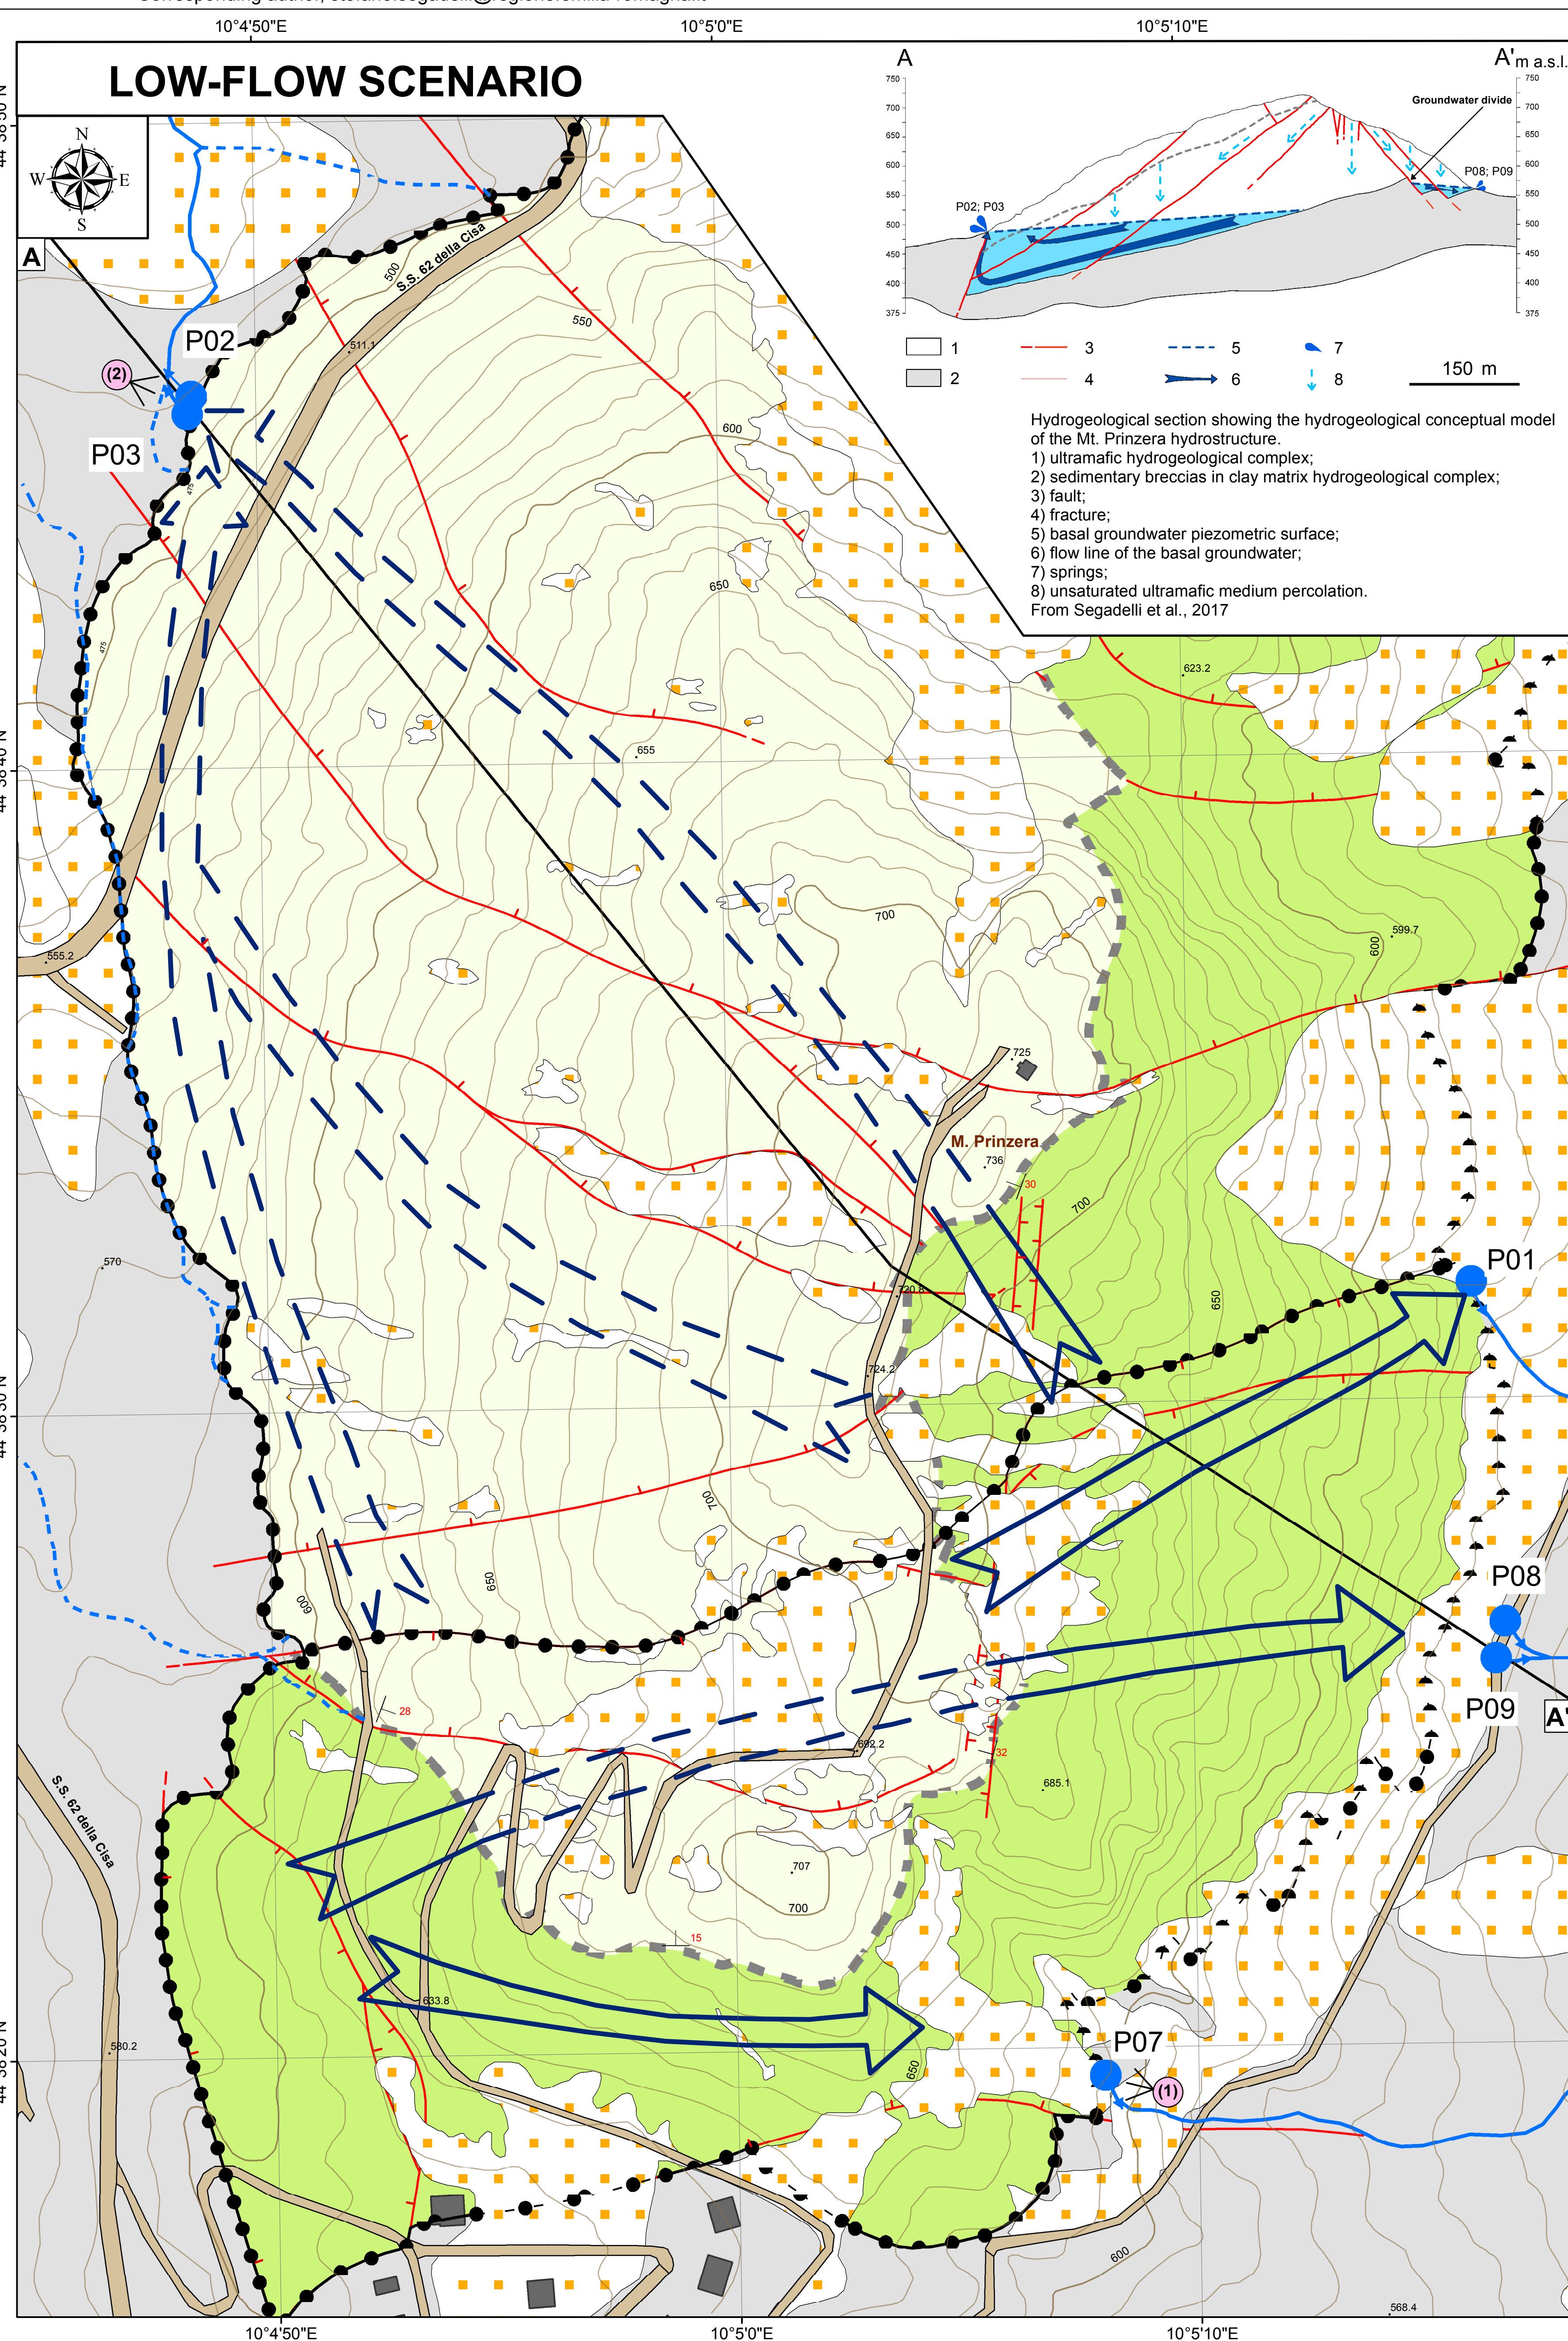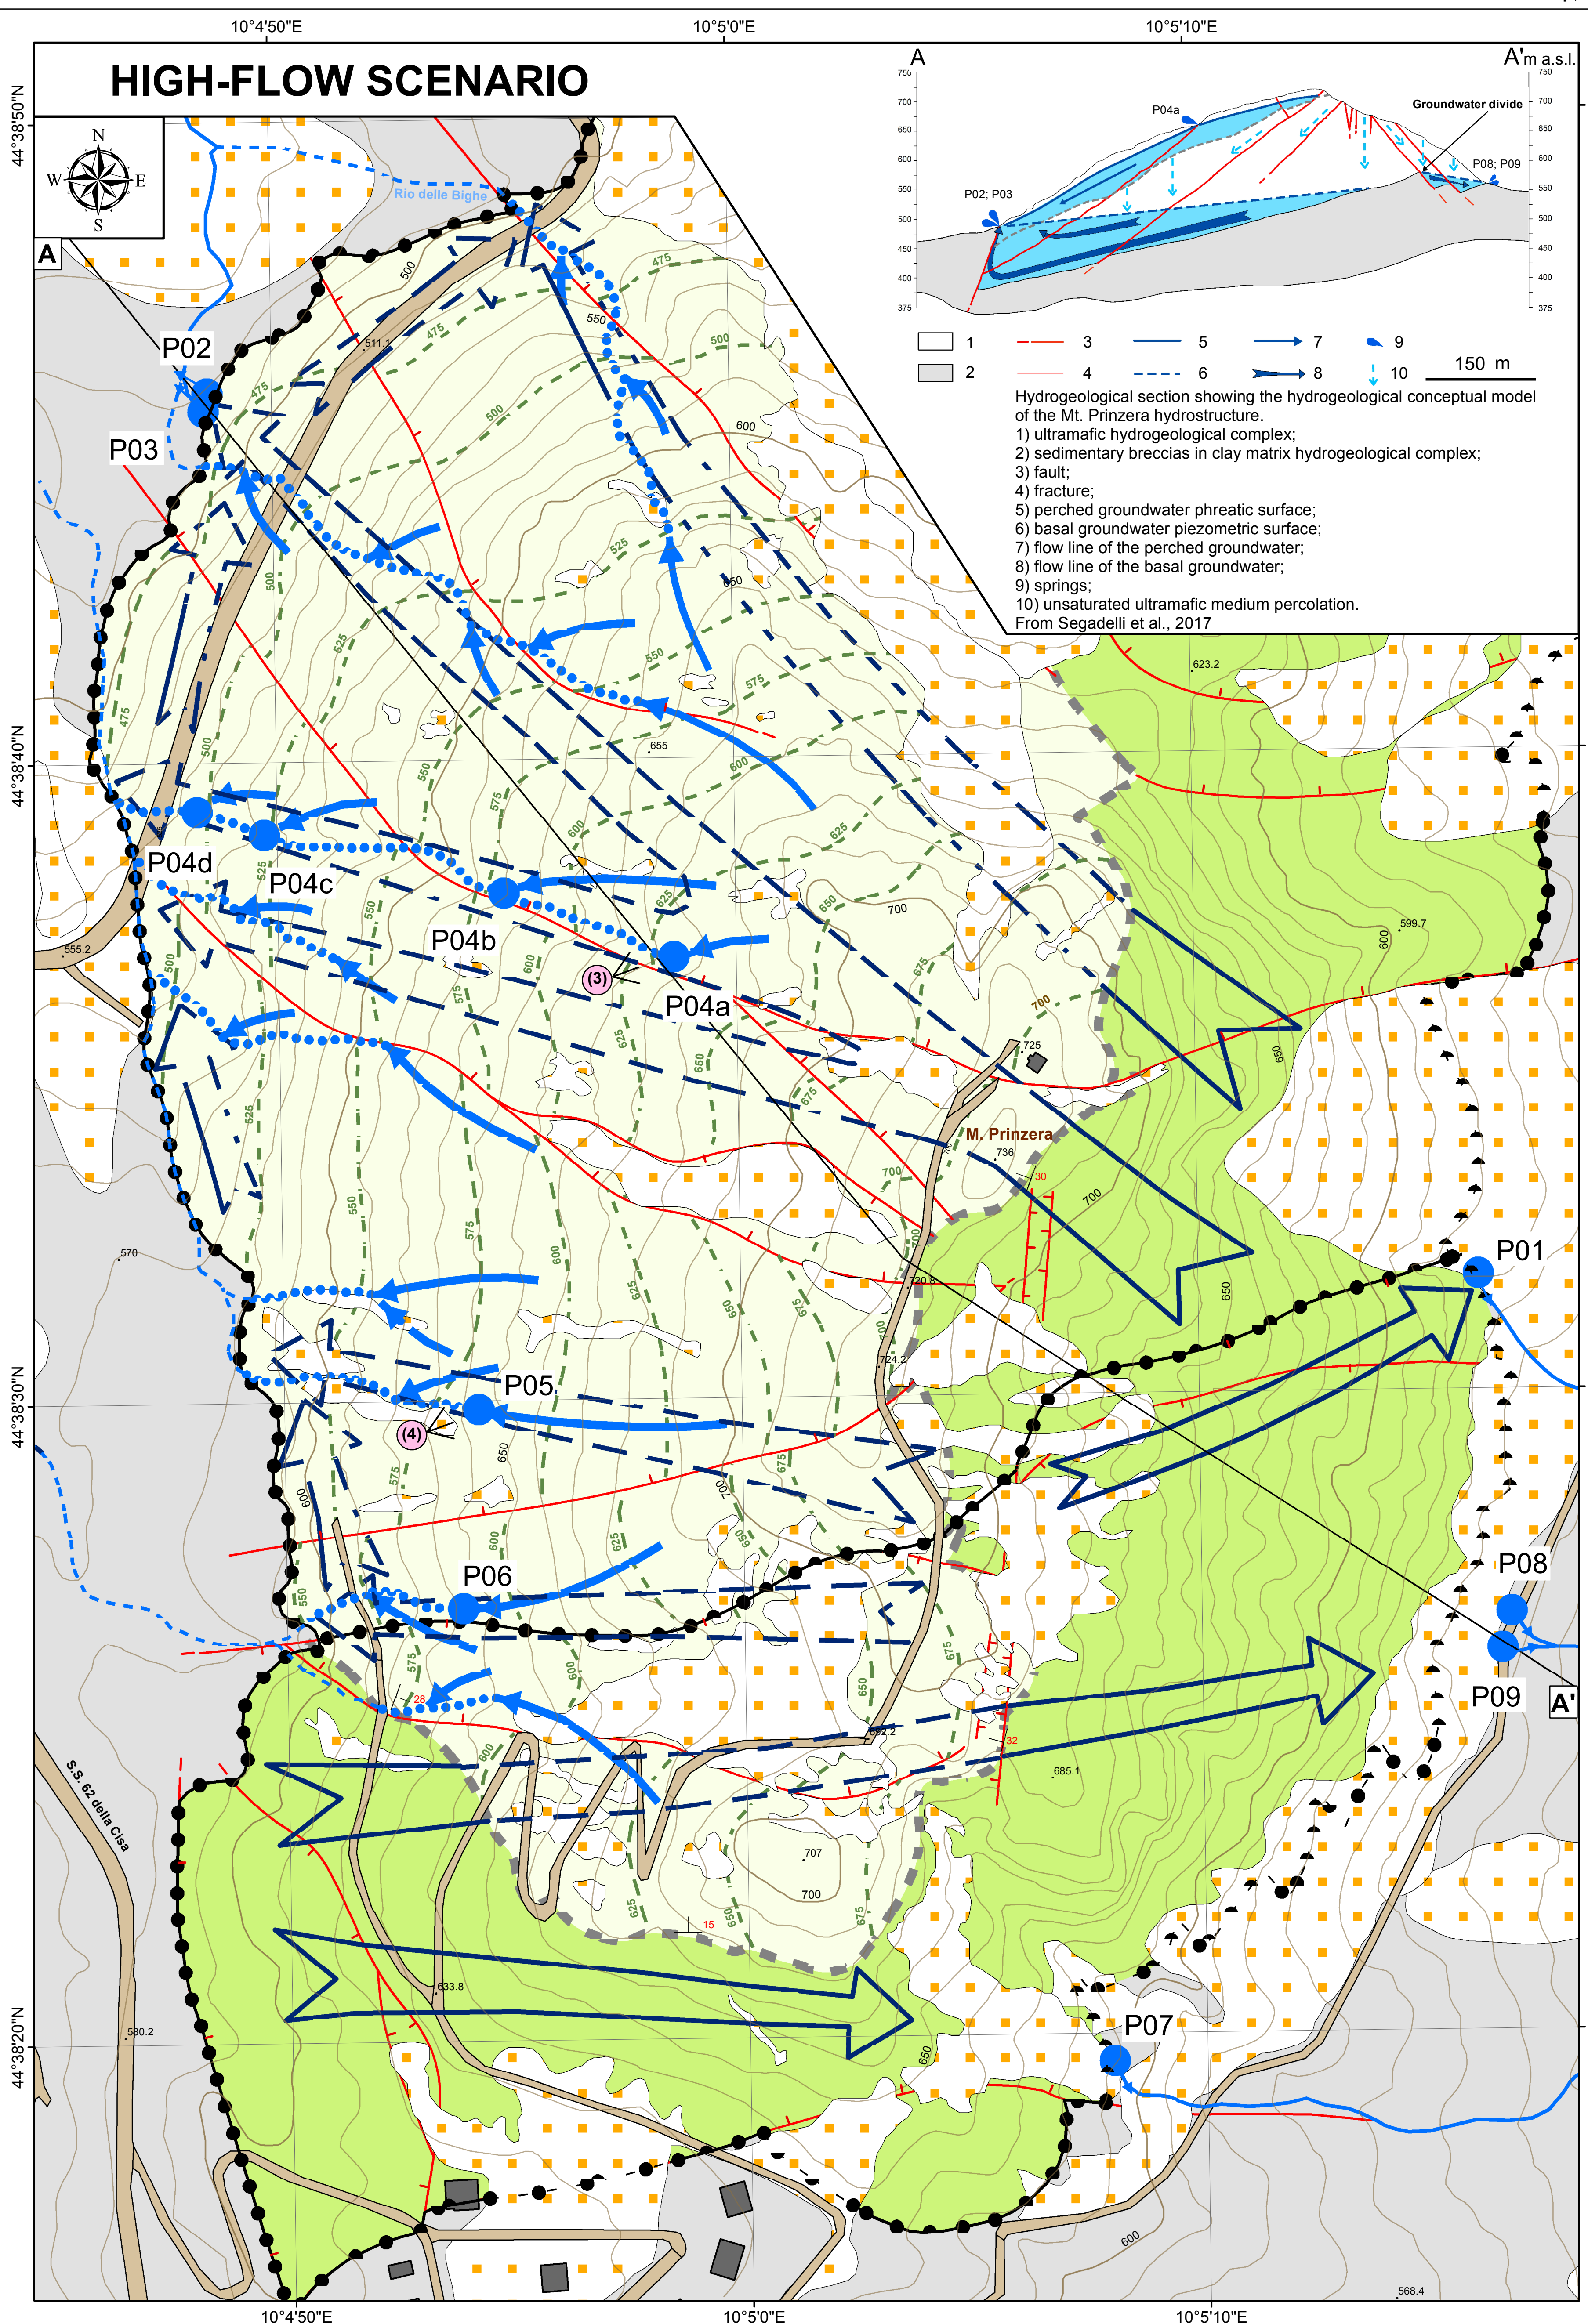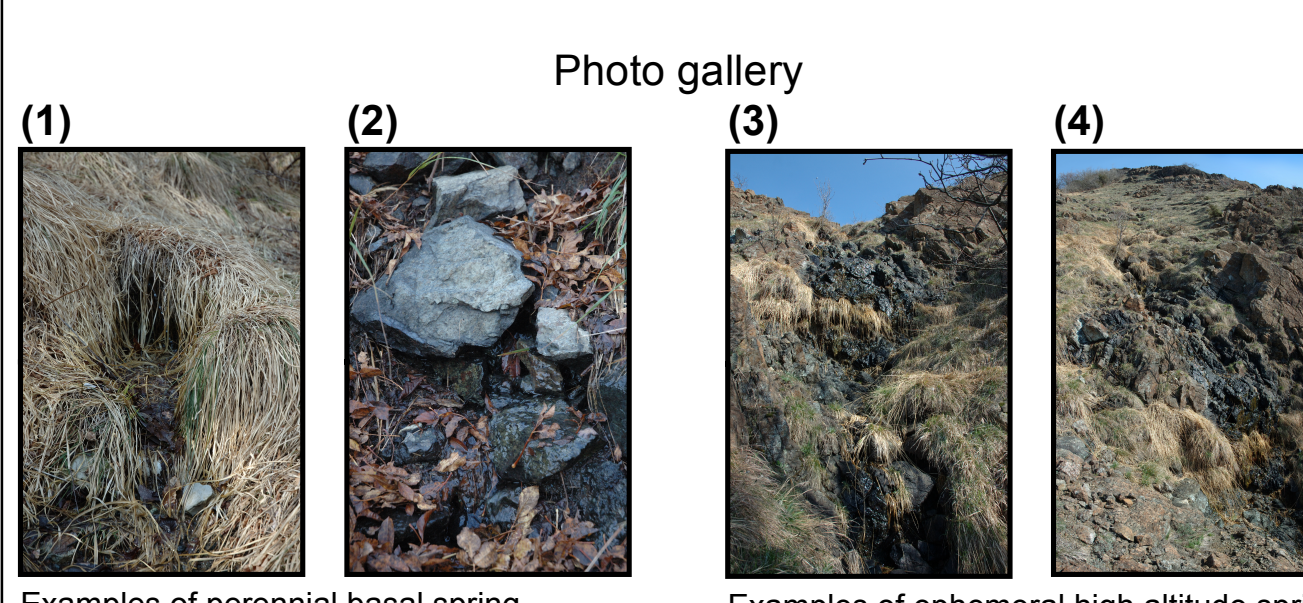

Photography point of view  
(for the number see photo gallery)

Grid: Geographic Coordinate System  
Datum W.G.S. 84

Base map data are from  
Regional Technical Map 1976.  
Contour lines interval 5 meters

Scale 1:1,600

**Topography**

Contour lines at 100m  
derived from DTM data

Contour lines at 10m  
derived from DTM data

Building

Road

**Structural and Geologic symbols**

Semipermeable attitude level (a)  
and dip values (b)

Geological cross section line

Lithologic boundary

**Hydrogeological complex**

Quaternary covers (QC)

Peridotites breccias with  
phacoidal foliation (perched aquifer - PPF)

Peridotites with sheet-like  
planar foliation (main aquifer - PSF)

Poligenic breccias with clay matrix  
(shallower aquitard - PB)

Peridotites breccias with  
phacoidal foliation (perched aquifer - PPF)

Peridotites with sheet-like  
planar foliation (main aquifer - PSF)

Poligenic breccias with clay matrix  
(shallower aquitard - PB)

Poligenic breccias with clay matrix  
(base aquitard - PB)

**Hydrological and Hydrogeological symbols**

Perennial spring and its code

Seasonal linear spring

Perennial stream

Ephemeral stream

Groundwater flow divide

Contour line related to the bottom  
of the perched aquifer. The value  
is in meters a.s.l.

Flow line of the  
perched groundwater

Flow line of the  
base groundwater  
(the dashed arrow is the  
flow line underlying  
the perched aquifer)
