# Supplementary material
Source: publisher figshare collection journal article supplement (https://tandf.figshare.com/articles/dataset/_/5427301)

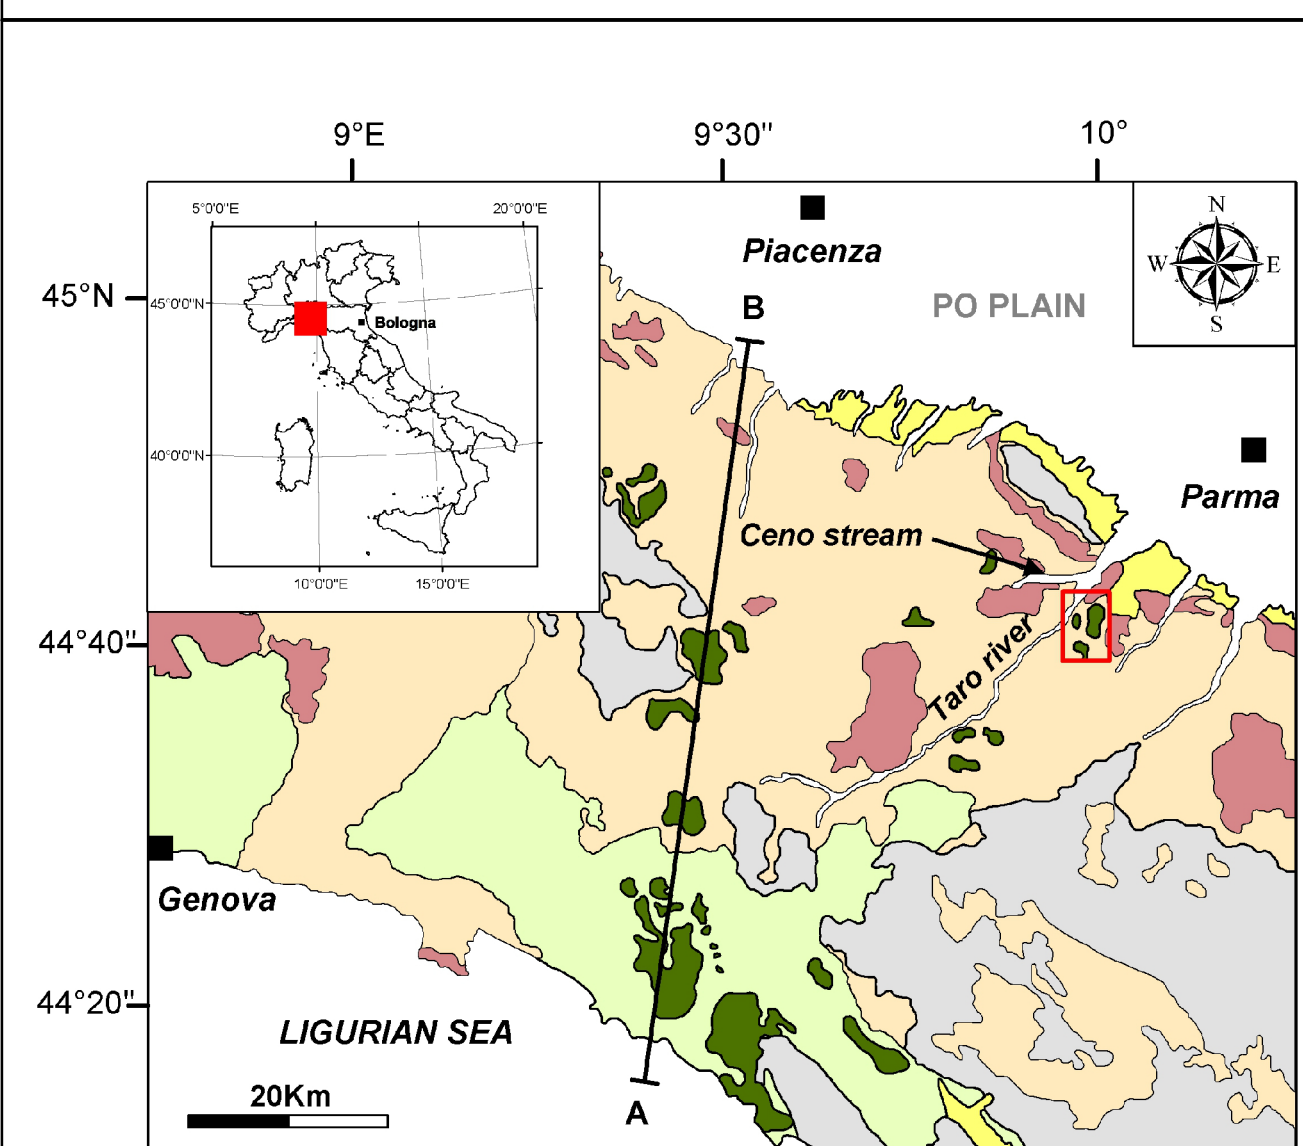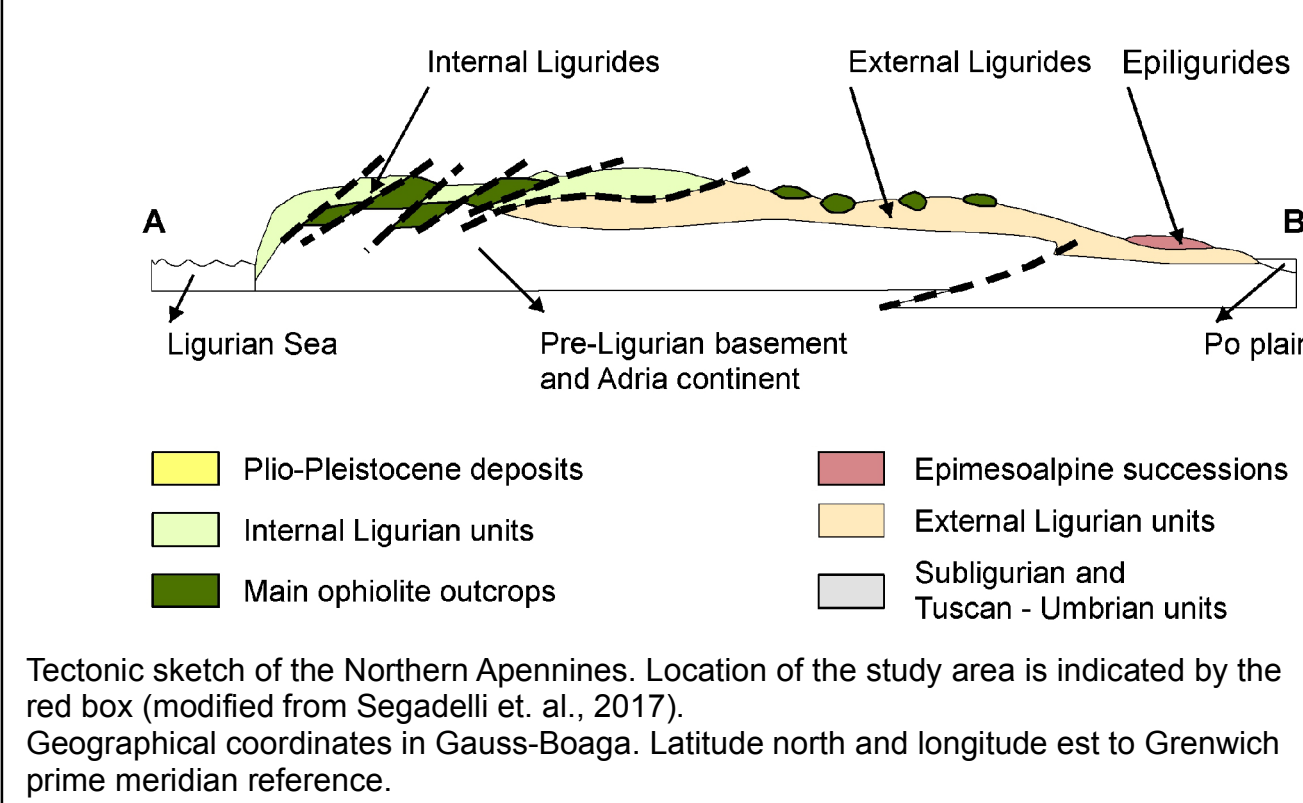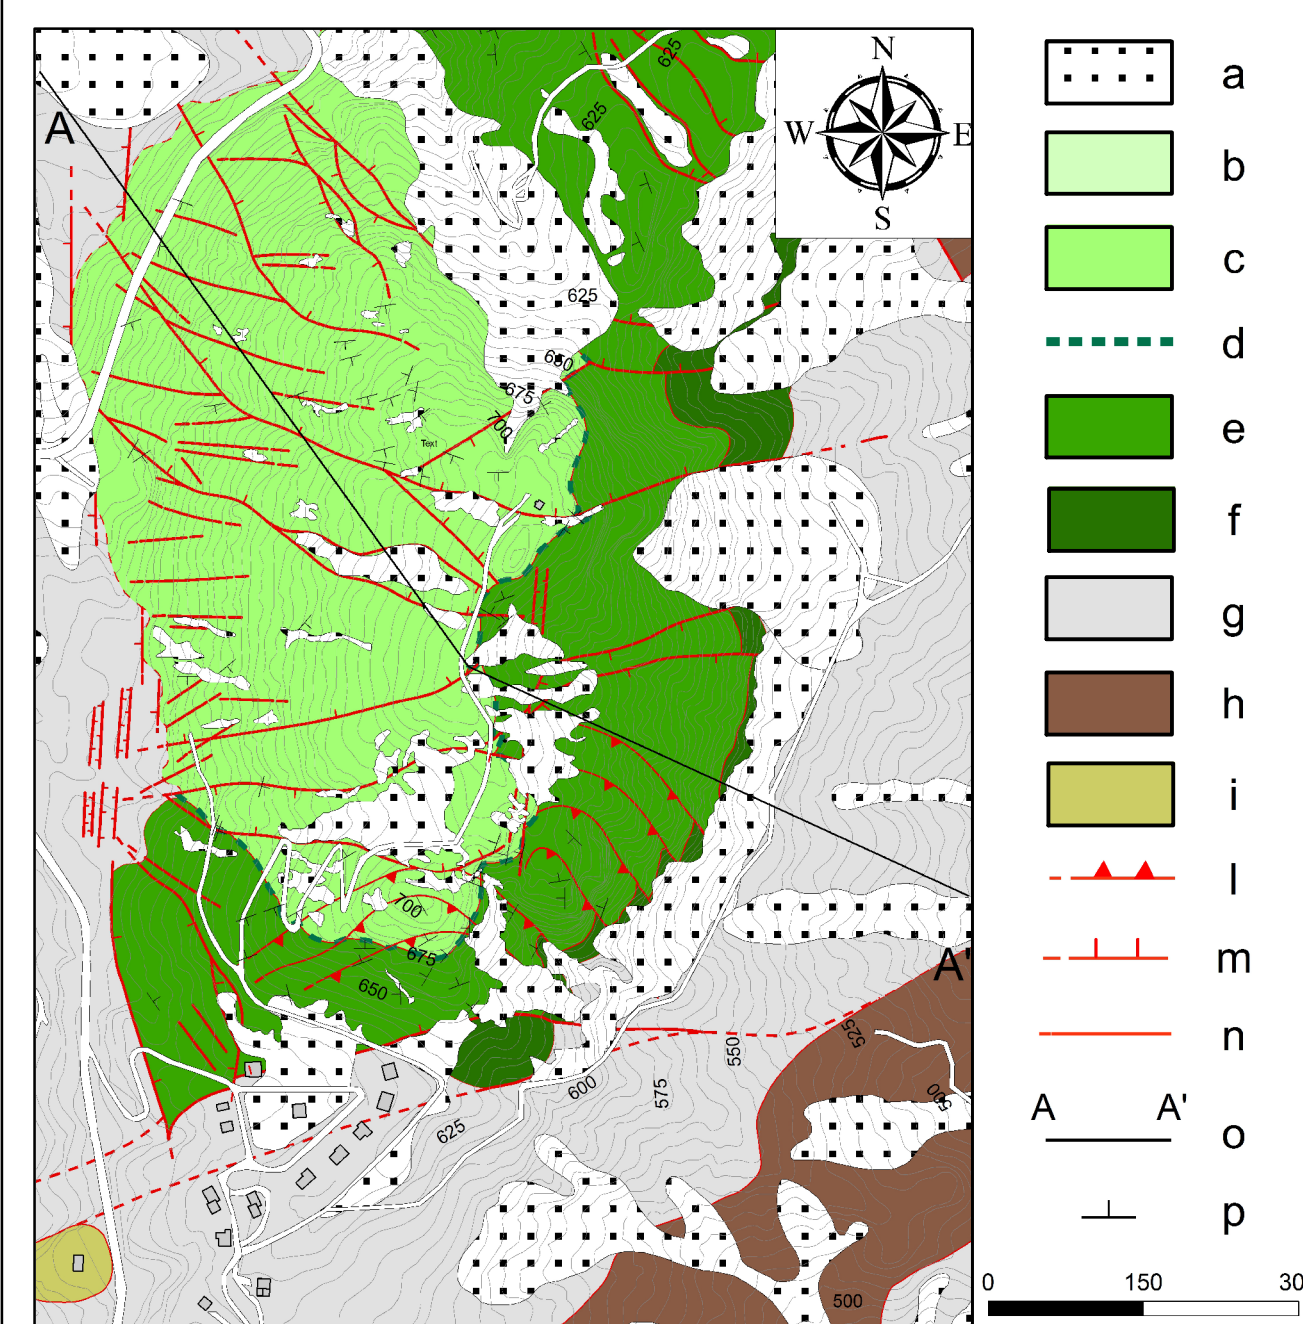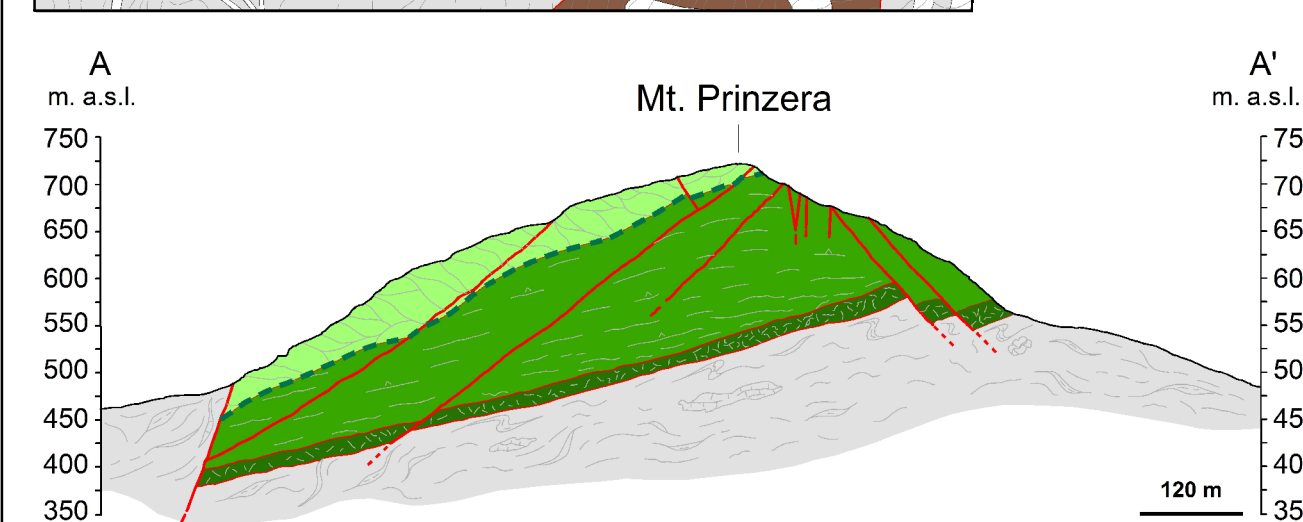

Geological map and geological cross-section of the study area. a: quaternary deposits; b: unit 5; c: unit 4; d: unit 3 (due to its short thickness, it is shown through the dashed line); e: unit 2; f: unit 1; g: polygenic breccias with matrix clay; h: helminthoid flysch; i: peridotites; l: thrust; m: fault (the teeth indicate the downwards moved side); n: tectonic contact; o: geological cross section; p: foliation attitude. Modified from Segadelli et al., (2017).

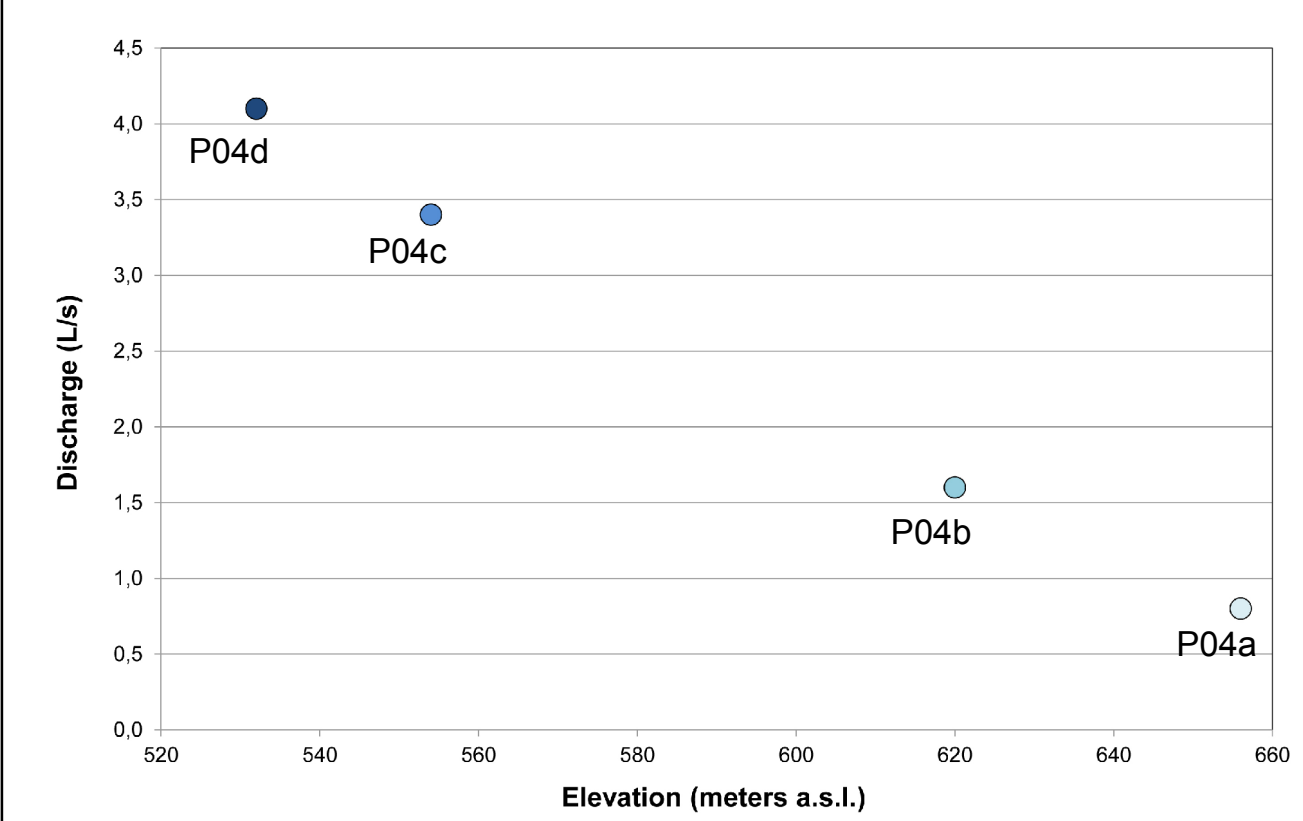

Seasonal springs discharge observed along the gully from the upper to the lower part of the incision. Modified from Segadelli et al., (2016).

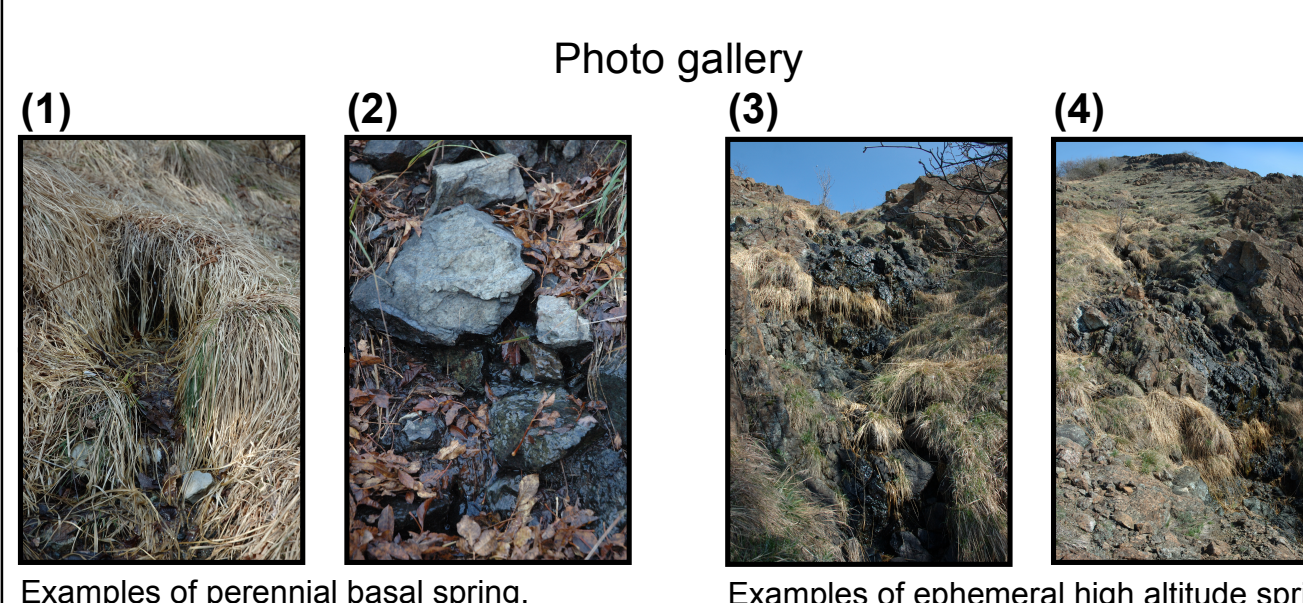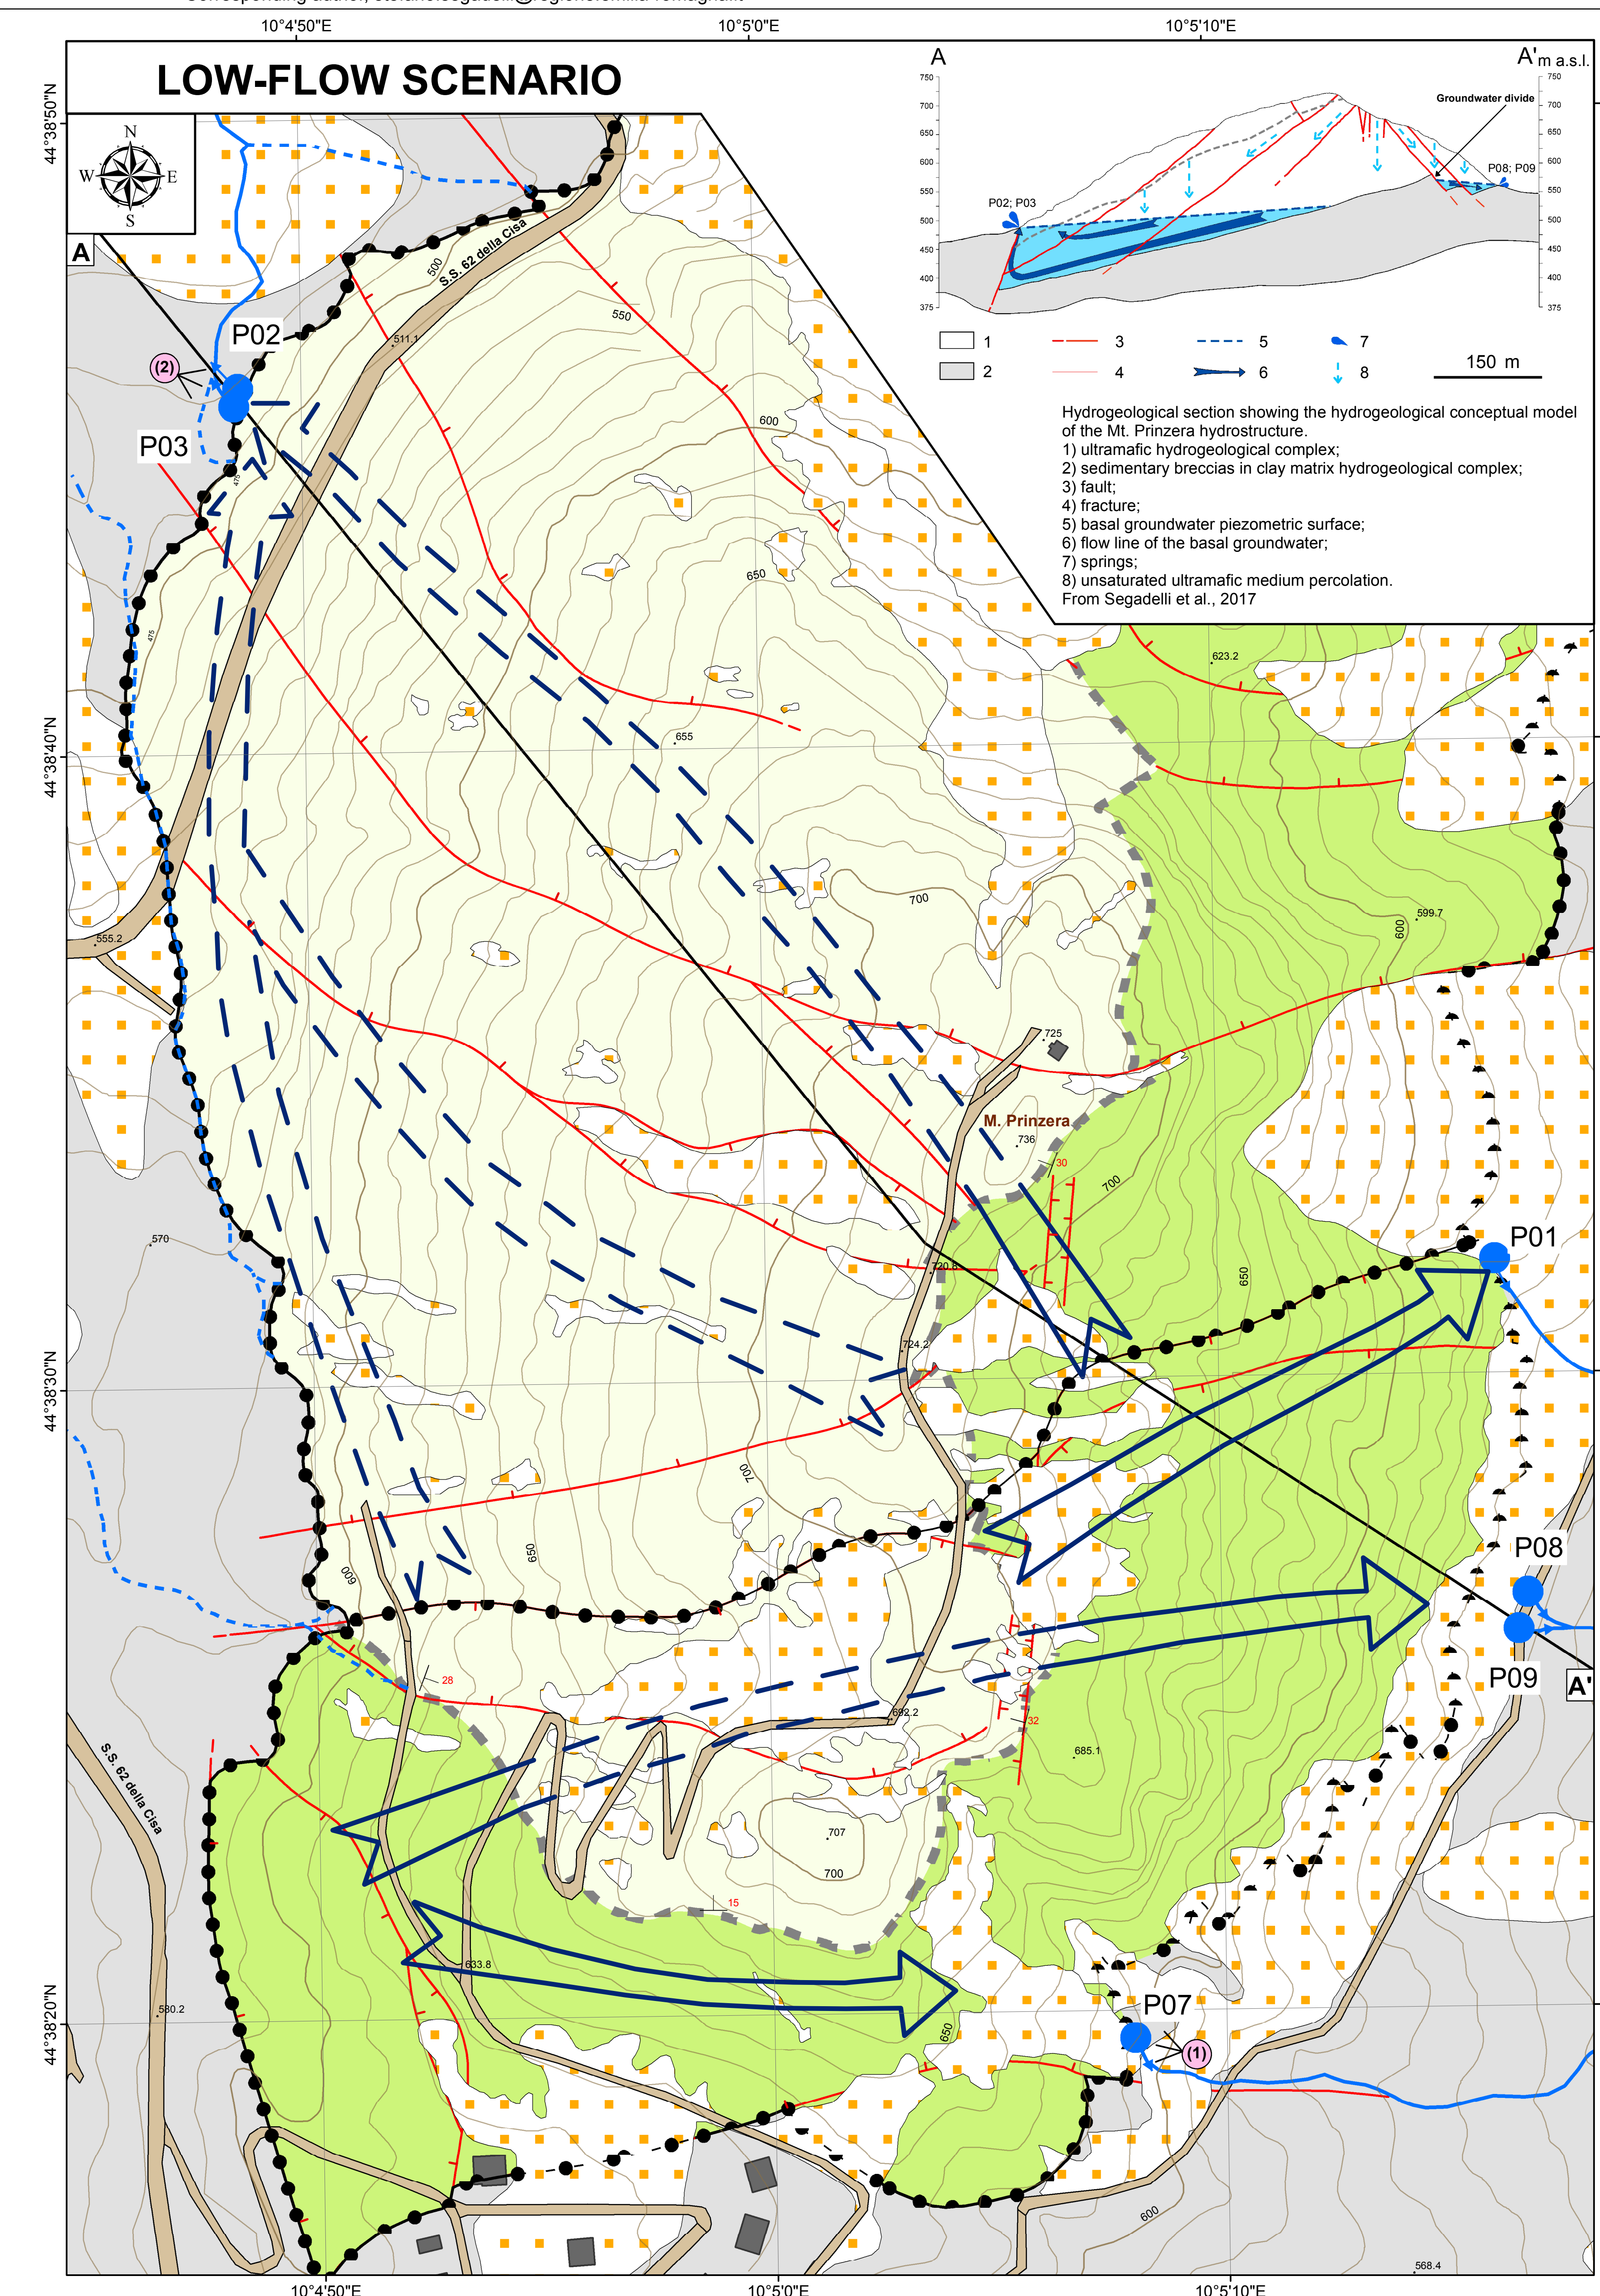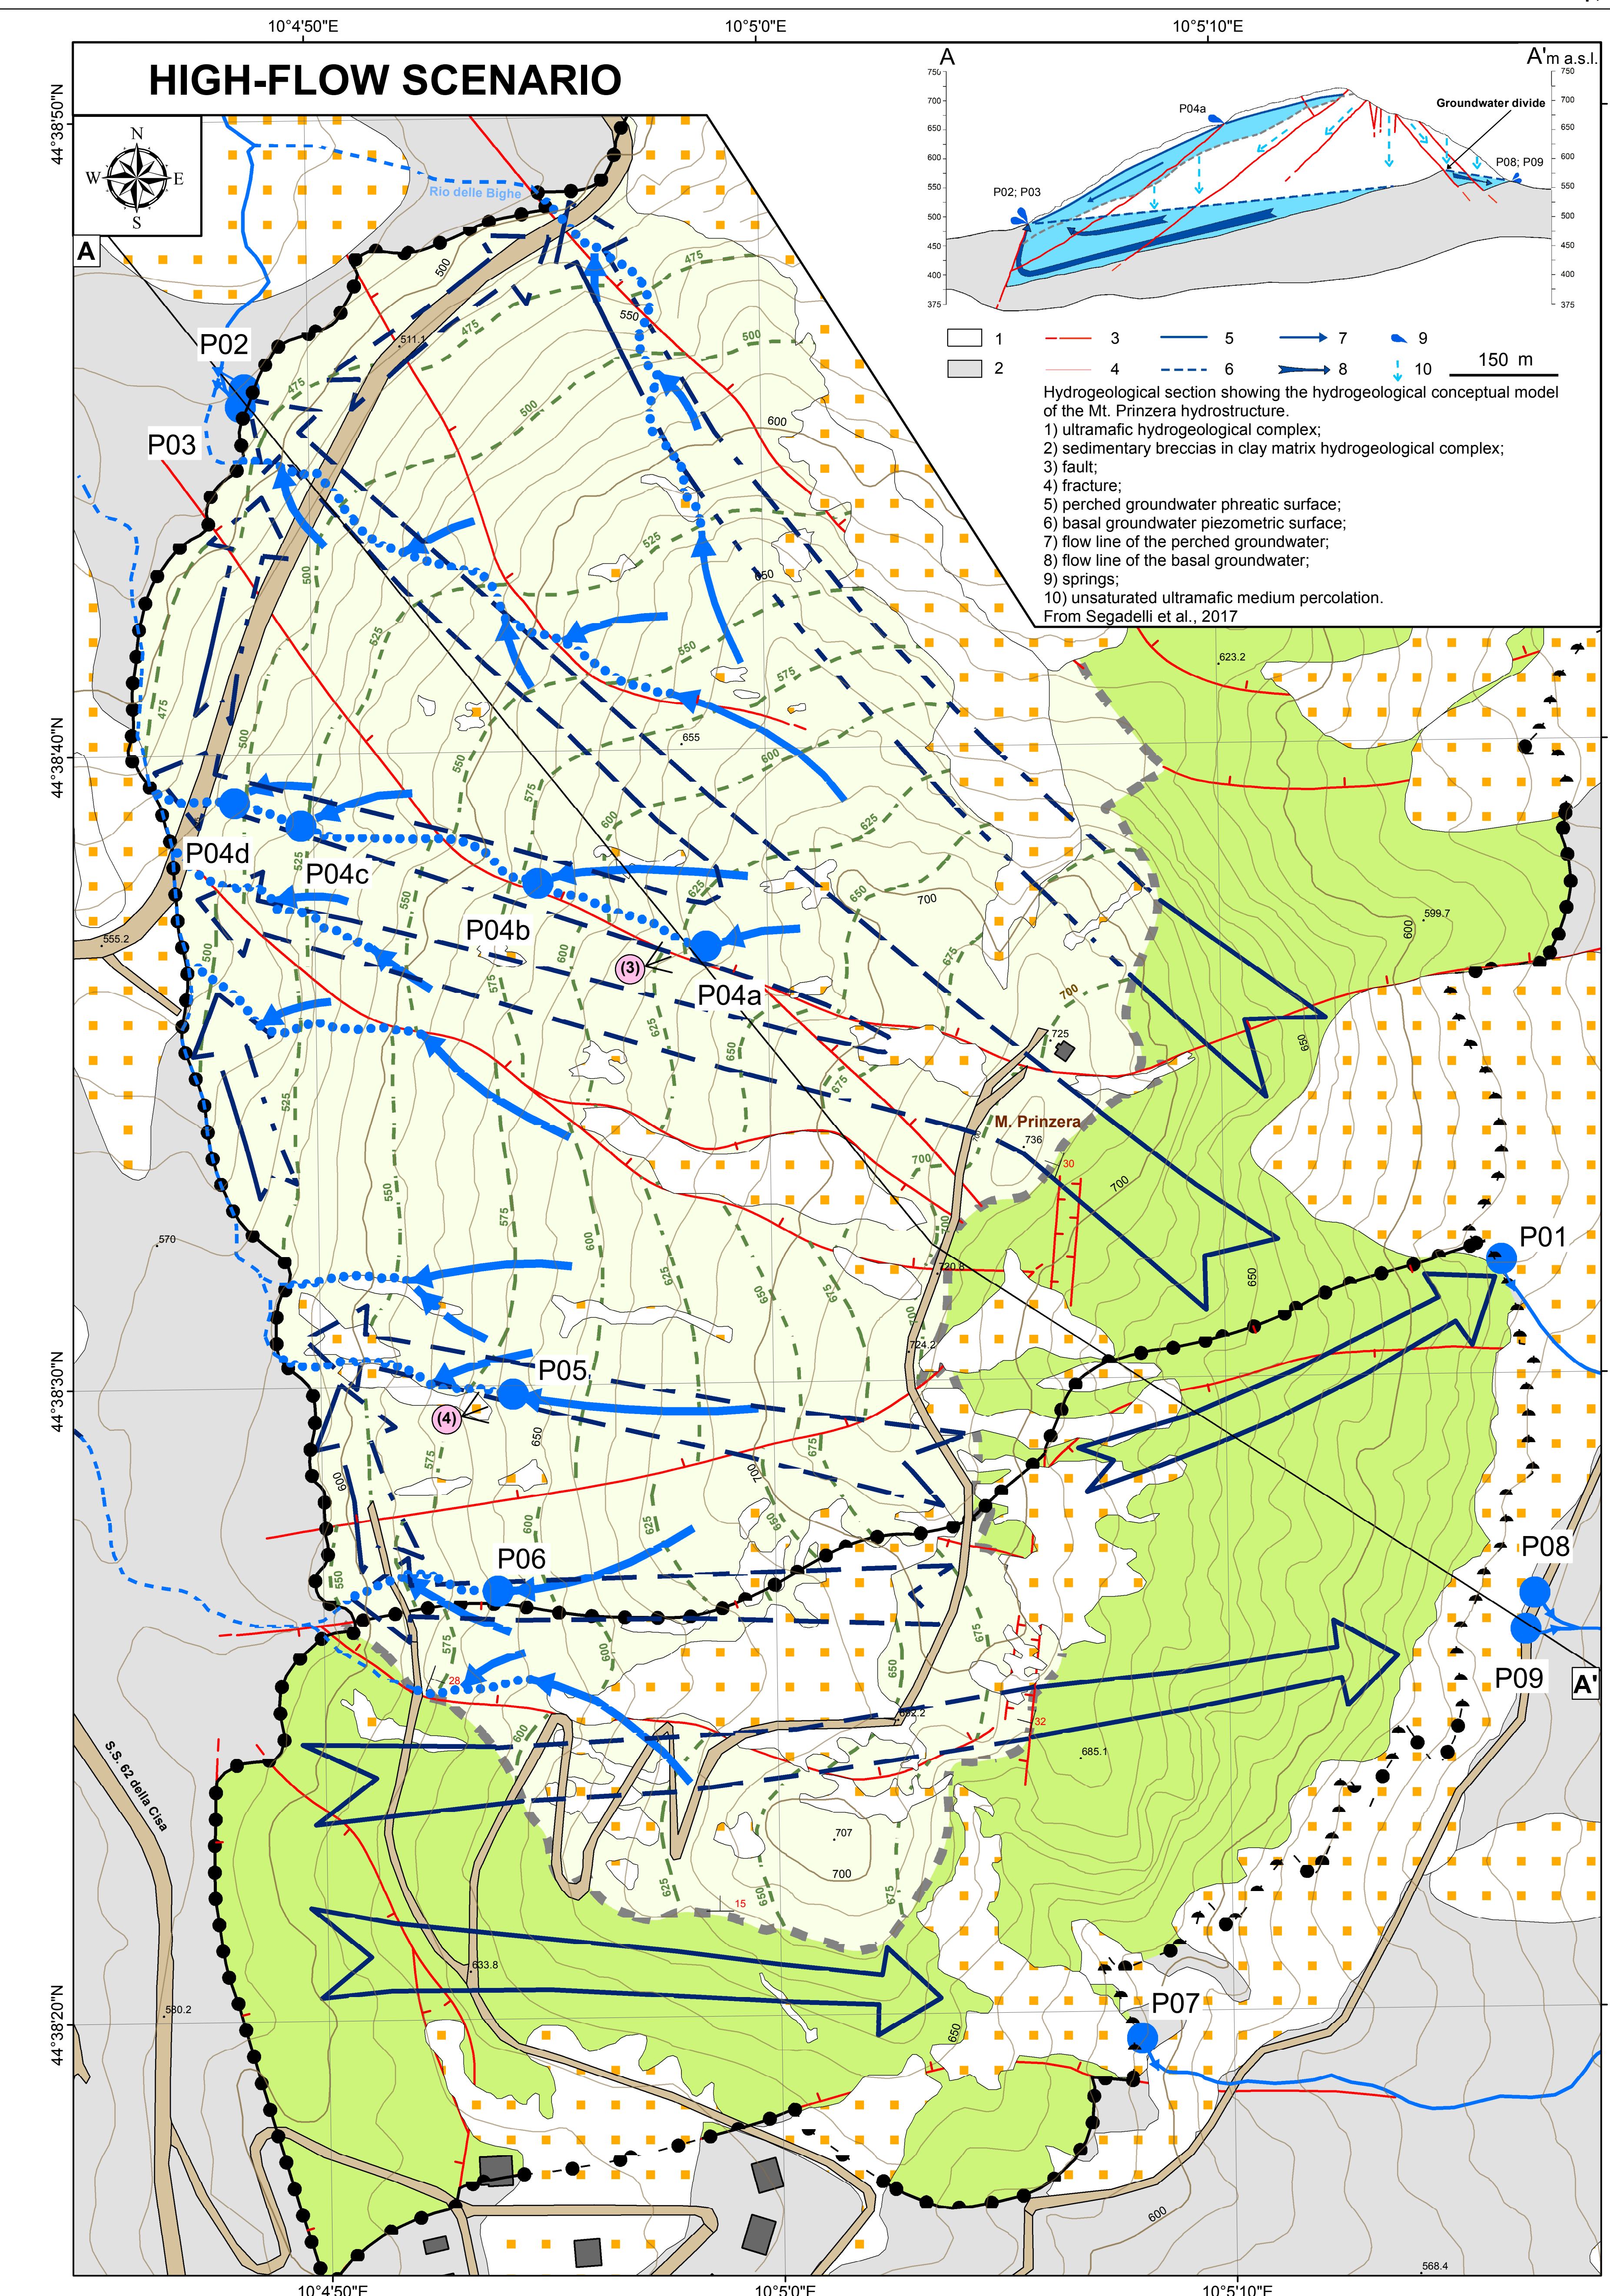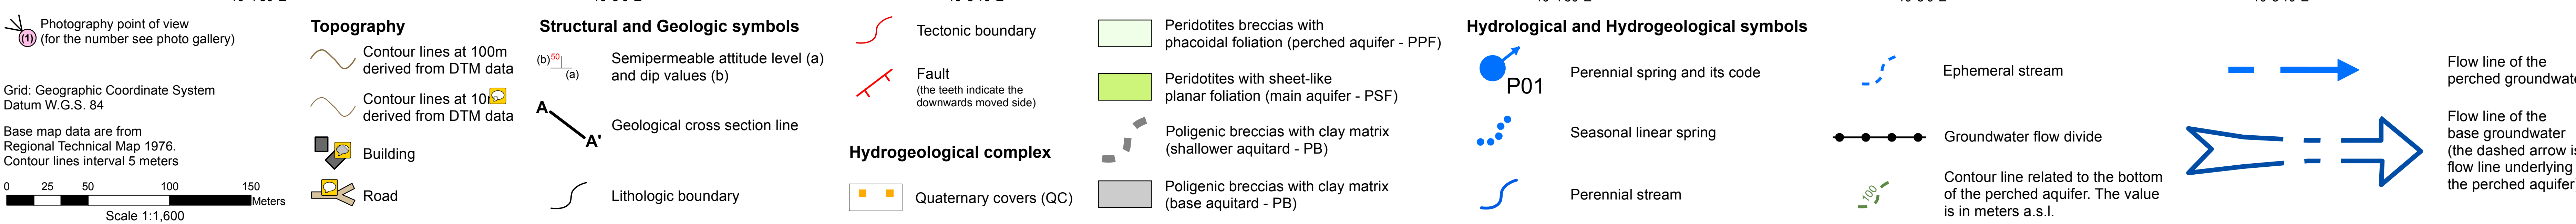

Supplement: Supplementary file 2 [file 1]
